# Supplementary material
Source: PubMed Central journal article supplement (PMC7869663)

1  
2  
3 **Proprotein convertase subtilisin–kexin type 9 inhibitors are unlikely to be cost-**  
4 **effective in Canada**  
5  
6  
7

## 8 Authors:

9 Todd C. Lee<sup>1,2</sup>, MD MPH; Mohammed Kaouache<sup>3</sup> PhD; Steven A. Grover<sup>1,4</sup> MD MPA  
10  
11

## 12 Affiliations:

13 <sup>1</sup>Division of General Internal Medicine, Department of Medicine, McGill University,  
14 Montreal, Quebec, Canada.  
15  
1617 <sup>2</sup>Clinical Practice Assessment Unit, McGill University Health Centre, Montreal, Quebec,  
18 Canada  
19  
2021 <sup>3</sup>Prince Sultan University, Department of General Sciences, Riyadh, Kingdom of Saudi  
22 Arabia  
23  
2425 <sup>4</sup>Centre for the Analysis of Cost-Effective Care, Montreal General Hospital, Montreal,  
26 Quebec, Canada  
27  
28

## 29 Correspondence to:

30 Todd C. Lee, MD MPH

31 McGill University Health Centre / Royal Victoria Hospital

32 1001 Decarie Blvd, D5.5843, Montreal QC H4A 3J1

33 [todd.lee@mcgill.ca](mailto:todd.lee@mcgill.ca)34 Fax: 514-221-4713  
35  
36  
37  
38

## 39 Funding Source:

40 Canadian Institute of Health Research (grant GIR-86935).  
41  
4243 Authors have no competing interests to declare.  
44

## 45 Word Counts:

46 Abstract: 242

47 Text: 1956  
48  
49  
50  
51  
52  
53  
54  
55  
56  
57  
58  
59  
60

## Abstract

**Background:** The proprotein convertase subtilisin–kexin type 9 (PCSK9) inhibitors, such as evolocumab, have garnered interest due to their ability to lower LDL by up to 60%. The Further Cardiovascular Outcomes Research with PCSK9 Inhibition in Subjects with Elevated Risk (FOURIER) trial has recently shown that non-fatal cardiovascular events can be prevented by the addition of evolocumab to statin therapy. Despite no cardiovascular or overall mortality benefit demonstrated, many believe that with longer treatment such a benefit could be achieved.

**Methods:** We calibrated the Cardio-metabolic model, a well-validated tool for predicting cardiovascular events and life expectancy, to the reduction in non-fatal events seen in the FOURIER trial. We estimated years of life saved (YOLS) with treatment compared to statins alone. We then estimated the costs of treatment and events prevented arrive at the average cost per YOLS. Finally, we estimated the annual drug costs which would provide a 50% chance of being cost-effective at a willingness to pay of \$50,000 and \$100,000 respectively.

**Results:** In secondary prevention treatment would save an average of 0.34 life years (95%CI 0.27-0.41) at a cost of \$101,899 (95%CI \$97,325-\$106,473) yielding a cost per YOLS of \$299,482. We estimate that to have a 50% probability of achieving a cost per YOLS below \$50,000 and \$100,000 would require annual drug costs below \$1,200 and \$2,300 respectively.

**Interpretation:** At current pricing, the use of PCSK9 inhibitors for secondary prevention is unlikely to be cost-effective in Canada.

## Introduction

Ischemic heart disease is common with an estimated 1 in 12 Canadians older than age 20 affected and more than 150,000 new cases in 2012-2013 (1). There have been tremendous improvements in the care of patients with cardiovascular disease brought about by therapeutic advances in risk factor modification including cholesterol lowering with statins. Over the same period there have also been technical advances in cardiac critical care, including the use of primary percutaneous coronary intervention for myocardial infarction. Consequently, since 2000, the death rate from ischemic heart disease has fallen in Canada by 23% (1).

Despite these advances, there is great interest in other therapies to further decrease attributable morbidity and mortality. Following the success of the statins, several other medications which lower low density lipoprotein (LDL) have been investigated for their ability to impact cardiovascular outcomes. The most recent of these, the proprotein convertase subtilisin–kexin type 9 (PCSK9) inhibitors, such as evolocumab, have garnered interest due to their ability to lower LDL by up to 60% (2). This LDL lowering comes at an estimated cost approaching \$7500 Canadian dollars per year. Until recently the impact of these drugs on hard outcomes remained unclear.

With the publication of the Further Cardiovascular Outcomes Research with PCSK9 Inhibition in Subjects with Elevated Risk (FOURIER) trial (2) in March 2017, we now have evidence that these agents reduce cardiovascular outcomes in secondary prevention amongst patients who were already taking a statin. In a randomized, double-blind, placebo-controlled trial involving 27,564 patients with pre-existing atherosclerotic cardiovascular heart disease from 1242 sites in 49 countries the addition of evolocumab reduced the risk of the primary endpoint (composite of cardiovascular death, myocardial infarction, stroke, hospitalization for unstable angina, or coronary revascularization) from 11.3% to 9.8% after a median duration of 2.2 years. There was no reduction in overall or cardiovascular mortality in this trial although there are many who believe that given a longer follow up period such a benefit might eventually be demonstrated. We

1  
2  
3 therefore estimated any potential mortality benefit over a patient's lifetime using a  
4 previously well-validated disease simulation approach, incorporating the Cardiovascular  
5 Disease Life Expectancy Model (3) and to estimate the costs per year of life saved  
6 (YOLS) for an average Canadian with established coronary artery disease. We then  
7 estimated the price threshold at which these drugs might be considered cost-effective.  
8  
9

## 10 11 12 13 **Methods**

### 14 15 16 17 *Model Overview*

18  
19  
20  
21 The Cardio-metabolic model was designed to estimate the clinical impact of multiple risk  
22 factors for diabetes and cardiovascular disease on life-expectancy. These risk factors  
23 include age, gender, blood pressure, total cholesterol, high density lipoprotein  
24 cholesterol, and other significant factors as previously described (4). These  
25 cardiovascular risk factors in turn increase the risk of dying of coronary disease and  
26 cerebrovascular disease. The model includes the Cardiovascular Life Expectancy  
27 Model to estimate the risk developing fatal or non-fatal coronary disease,  
28 cerebrovascular disease and/or the risk of dying a non-cardiovascular death.  
29  
30  
31  
32  
33  
34  
35  
36

### 37 38 39 *Cardiovascular Life Expectancy Model*

40  
41 This previously published Markov model has been described in detail (3, 5-8). Briefly,  
42 the model is based on three logistic regression equations derived from the 15% random  
43 sample of the Lipid Research Clinic Cohort (3). The average length of follow-up was  
44 12.2 years. Our equations estimate the annual probability of dying from coronary heart  
45 disease, stroke, or other causes. Initially, the model was validated on the fatal outcomes  
46 observed in published lipid and hypertension clinical trials (3). Similarly, the  
47 cardiovascular outcomes for individuals with diabetes were validated from trial results  
48 (8). The life expectancy estimates generated by the model have also been validated  
49 against published life tables for Americans and Canadians (5, 6).  
50  
51  
52  
53  
54  
55  
56  
57  
58  
59  
60

1  
2  
3  
4  
5  
6  
7  
8  
9  
10  
11  
12  
13  
14  
15  
16  
17  
18  
19  
20  
21  
22  
23  
24  
25  
26  
27  
28  
29  
30  
31  
32  
33  
34  
35  
36  
37  
38  
39  
40  
41  
42  
43  
44  
45  
46  
47  
48  
49  
50  
51  
52  
53  
54  
55  
56  
57  
58  
59  
60

Once we validated the model estimates on fatal outcomes observed in clinical trials, we estimated the risk of developing nonfatal cardiovascular disease outcomes as follows. The probabilities of developing coronary insufficiency, a nonfatal myocardial infarction, a transient ischemic attack, or a nonfatal stroke were estimated by the ratios of nonfatal to fatal events predicted by the results of several studies providing primary or secondary cardiovascular disease outcomes. We subsequently also estimated the probability of various vascular procedures using hospitalization and health care utilization data from Canada, and the United States (7).

### *Calibrating the Model to Estimate the Results of the FOURIER Study*

The Cardio-metabolic model was calibrated so that the hazard ratio, treatment vs control, for a combined outcome (cardiovascular death, myocardial infarction, or stroke) over a two-year follow-up period, would be approximate the observed results in the FOURIER trial. We identified lower and upper bounds on our LDL coefficients that produced hazard ratios respectively similar to the upper and lower bound of the confidence intervals for the hazard ratio in the FOURIER trial. We then incorporated uncertainty about the LDL coefficients by eliciting normal distributions with standard deviations equal to one quarter the difference between the upper and lower bounds.

Cardiovascular mortality and total mortality were similar between the treatment and control groups in the FOURIER study despite the positive impact on non-fatal cardiovascular events. We therefore assumed that given the impact of active on non-fatal cardiovascular events by approximately -25 to -20%, fatal events should follow the same trend over time despite the observed short term results.

### *Estimating Years of Life Saved and The Cost Effectiveness of Lipid Modification*

Our modeling approach has been described in detail elsewhere (3). When comparing treatments having a differential effect on risk factors, the benefits associated with one treatment over the other are calculated as the YOLS due to the “first” treatment over the

1  
2  
3 “second” treatment. This value is computed as  $YOLS = LE_{\text{first}} - LE_{\text{second}}$ , where LE  
4 indicates life expectancy. In this study, the first treatment was receipt of a PCSK9  
5 inhibitor in addition to a statin and the second was statin treatment alone.  
6  
7  
8  
9

10 The methods used to assign unit cost to acute events and chronic treatments have also  
11 been previously described (7). In this analysis, previously estimated treatment costs  
12 were inflated to 2017 costs using the Canadian Health Care Inflation Index published by  
13 Statistics Canada. The cost of PCSK9 inhibitors were based on the current Canadian  
14 market price of evolocumab or \$7,500 annually. Uncertainty about our estimated costs  
15 was expressed by eliciting uniform distributions on a range of values (point estimates  
16 plus/minus 20%).  
17  
18  
19  
20  
21  
22  
23

24 We calculated the incremental costs per YOLS of PCSK9 therapy by calculating the  
25 difference between lifetime medical costs with and without evolocumab divided by the  
26 difference in the forecasted life expectancies. Because the costs and the health  
27 outcomes occur at different times, we discounted both by 3% annually.  
28  
29  
30  
31  
32

33 Simultaneously adjusting for uncertainty in costs and model coefficients involved  
34 simulating 1000 sets of values for these coefficients and costs from their respective  
35 distributions. For each one simulated set of values we obtained an estimate of years of  
36 life saved and lifetime incremental costs. Using these results of YOLS and incremental  
37 costs, we constructed confidence intervals around our estimates.  
38  
39  
40  
41  
42

43 We then generated cost-effectiveness acceptability curves showing the percentage of  
44 the 1000 simulated results that would give, for a specified amount, the proportion of  
45 simulations resulting in a positive incremental net benefit as a function of the annual  
46 drug costs.  
47  
48  
49  
50  
51

## 52 53 54 55 **Results** 56 57 58 59 60

1  
2  
3 The estimated numbers of events prevented with therapy are presented in Table 1 and  
4 the estimated costs of cardiovascular or other events are included in the supplemental  
5 appendix (Table S1). The estimated cost per year of life saved for male and female  
6 patients based on various ages of initiation of evolocumab treatment are presented in  
7 Table 2. For a population like that seen in FOURIER, treatment would save, on  
8 average, 0.34 life years (95%CI 0.27-0.41) at a cost of \$101,899 (95%CI \$97,325-  
9 \$106,473) yielding a cost per YOLS of \$299,482. In general, the older the patient the  
10 lower the cost per YOLS. This was primarily due to reduced drug costs over the number  
11 of treatment years that rather than increased survival benefits at older ages.  
12  
13  
14  
15  
16  
17  
18  
19

20 Our probabilistic sensitivity analysis (Figure 1) estimated that to have a 50% probability  
21 of achieving a cost per YOLS below \$50,000 and \$100,000 would require annual drug  
22 costs below \$1,200 and \$2,300 respectively. Above \$1,800 or \$3,000 the probability of  
23 cost-effectiveness a ratio equal to \$50,000 or \$100,000 respectively is zero.  
24  
25  
26  
27  
28

### 29 **Interpretation**

30  
31 There was no cardiovascular or total mortality benefit seen in the FOURIER trial;  
32 nonetheless, the possibility for LDL lowering by PCSK9 inhibitors to reduce mortality  
33 over time may exist. However, despite this optimistic assumption these agents are  
34 unlikely to be cost-effective at current Canadian prices. More than an 80% discount  
35 from current pricing would be required to have a 50% chance of being cost-effective at a  
36 willingness to pay of \$50,000 per YOLS.  
37  
38  
39  
40  
41  
42

43 There are several articles on the cost-effectiveness of PCSK9 inhibitors which have  
44 both included and not included pharmaceutical industry authors. Our study has the  
45 advantage of being the first based on a model calibrated to the observed cardiovascular  
46 effect from a large randomized-controlled trial which was specifically designed to look at  
47 cardiovascular outcomes in secondary prevention. Hence, the uncertainty surrounding  
48 the drugs actual effectiveness is substantially reduced.  
49  
50  
51  
52  
53  
54

55 Amongst those studies which did not include an industry author, Korman estimated that  
56 for the highest benefit secondary prevention group (Norwegian individuals with  
57  
58  
59  
60

1  
2  
3 diabetes) the estimated cost per quality-adjusted life year (QALY) was 68,400 euros  
4 (approximately \$100,000 Canadian Dollars) (9). Kazi et. al concluded the drugs were  
5 unlikely to be cost-effective for secondary prevention at a threshold of \$100,000 US  
6 Dollars (approximately \$137,000 Canadian dollars) unless the annual price was  
7 reduced to \$4536 US (approximately \$6200 Canadian) (10). Arrieta et al. arrive at the  
8 same conclusion with a similar estimate of \$4250 US (11). Estimates from the Institute  
9 for Clinical and Economic Review suggested an annual price of \$3166, \$5404, and  
10 \$7735 US dollars to reach thresholds of \$50,000, \$100,000 and \$150,000 US per QALY  
11 respectively (12).  
12  
13  
14  
15  
16  
17  
18  
19

20 In studies involving an industry author, Gandra estimated that the cost of secondary  
21 prevention in the United States would approach US\$141,699 per QALY (approximately  
22 \$190,000 Canadian Dollars) (13) and Toth et. al attempted to identify an upper ceiling of  
23 pricing by comparing current pricing to a willingness to pay of \$150,000 US dollars  
24 (approximately \$200,000 Canadian dollars) per QALY(14). Villa et. al concluded that  
25 evolocumab would be cost-effective for secondary prevention in Spain with an  
26 incremental cost effectiveness ratio of 45,340 euros per QALY (approximately \$67,000  
27 Canadian dollars) (15).  
28  
29  
30  
31  
32  
33  
34  
35

36 The principal limitation of our study is that the results are based on a model which was  
37 developed to evaluate the impact of statins and not specifically developed for PCSK9  
38 inhibitors. The assumption that cardiovascular and all-cause mortality will be lowered by  
39 PCSK9 inhibitors remains theoretical. There are several important examples of drugs  
40 which lower LDL but have not been shown to reduce mortality (16-18). Thus, our results  
41 likely represent a best-case scenario. Our approach is also limited by not including the  
42 potential cost of side effects that may only be recognized after a new medication has  
43 been used over the longer term. For instance cognitive impairment remains a concern  
44 with extremely low LDL levels and a two year trial may be insufficient to address this  
45 issue (19). We also assume the drug will maintain efficacy over the duration of  
46 treatment; however one such molecule has had development stopped due to immune  
47 reactions against the monoclonal antibody (20) and other anti-drug antibodies have  
48 been reported (21).  
49  
50  
51  
52  
53  
54  
55  
56  
57  
58  
59  
60



### *Conclusion*

Using a well-validated model for predicting cardiovascular events and mortality we demonstrate that at current pricing the current generation of PCSK9 inhibitors are unlikely to be cost-effective for preventing mortality in secondary prevention patients with high cardiovascular risk. With evolving long term follow up data and adjustments in pricing future analyses will need to re-evaluate whether these medications should become the standard of care for Canadian patients. In the interim, it is likely their use should remain limited to exceptional cases.

Confidential

## References

1. Public Health Agency of Canada. Heart Disease in Canada 2017 [February 9, 2017]:[Available from: <https://www.canada.ca/content/dam/phac-aspc/documents/services/publications/diseases-conditions/heart-disease-maladies-coeur-eng.pdf>].
2. Sabatine MS, Giugliano RP, Keech AC, Honarpour N, Wiviott SD, Murphy SA, et al. Evolocumab and Clinical Outcomes in Patients with Cardiovascular Disease. *New England Journal of Medicine*. 0(0):null.
3. Grover SA, Paquet S, Levinton C, Coupal L, Zowall H. Estimating the benefits of modifying risk factors of cardiovascular disease: a comparison of primary vs secondary prevention. *Archives of internal medicine*. 1998;158(6):655-62.
4. Grover SA, Kaouache M, Rempel P, Joseph L, Dawes M, Lau DC, et al. Years of life lost and healthy life-years lost from diabetes and cardiovascular disease in overweight and obese people: a modelling study. *The lancet Diabetes & endocrinology*. 2015;3(2):114-22.
5. Grover SA, Coupal L, Gilmore N, Mukherjee J. Impact of dyslipidemia associated with Highly Active Antiretroviral Therapy (HAART) on cardiovascular risk and life expectancy. *The American journal of cardiology*. 2005;95(5):586-91.
6. Grover SA, Coupal L, Kaouache M, Lowensteyn I. Preventing cardiovascular disease among Canadians: what are the potential benefits of treating hypertension or dyslipidemia? *The Canadian journal of cardiology*. 2007;23(6):467-73.
7. Grover SA, Coupal L, Paquet S, Zowall H. Cost-effectiveness of 3-hydroxy-3-methylglutaryl-coenzyme A reductase inhibitors in the secondary prevention of cardiovascular disease: forecasting the incremental benefits of preventing coronary and cerebrovascular events. *Archives of internal medicine*. 1999;159(6):593-600.
8. Grover SA, Coupal L, Zowall H, Dorais M. Cost-effectiveness of treating hyperlipidemia in the presence of diabetes : who should be treated? *Circulation*. 2000;102(7):722-7.
9. Korman M, Wisloff T. Modelling the cost-effectiveness PCSK9 inhibitors vs. ezetimibe through LDL-C reductions in a Norwegian setting. *European heart journal Cardiovascular pharmacotherapy*. 2017.
10. Kazi DS, Moran AE, Coxson PG, Penko J, Ollendorf DA, Pearson SD, et al. Cost-effectiveness of PCSK9 Inhibitor Therapy in Patients With Heterozygous Familial Hypercholesterolemia or Atherosclerotic Cardiovascular Disease. *Jama*. 2016;316(7):743-53.
11. Arrieta A, Page TF, Veledar E, Nasir K. Economic Evaluation of PCSK9 Inhibitors in Reducing Cardiovascular Risk from Health System and Private Payer Perspectives. *PloS one*. 2017;12(1):e0169761.
12. Tice JA, Kazi DS, Pearson SD. Proprotein convertase subtilisin/kexin type 9 (pcsk9) inhibitors for treatment of high cholesterol levels: Effectiveness and value. *JAMA internal medicine*. 2016;176(1):107-8.
13. Gandra SR, Villa G, Fonarow GC, Lothgren M, Lindgren P, Somaratne R, et al. Cost-Effectiveness of LDL-C Lowering With Evolocumab in Patients With High Cardiovascular Risk in the United States. *Clinical cardiology*. 2016;39(6):313-20.

14. Toth PP, Danese M, Villa G, Qian Y, Beaubrun A, Lira A, et al. Estimated burden of cardiovascular disease and value-based price range for evolocumab in a high-risk, secondary-prevention population in the US payer context. *Journal of medical economics*. 2017:1-10.
15. Villa G, Lothgren M, Kutikova L, Lindgren P, Gandra SR, Fonarow GC, et al. Cost-Effectiveness of Evolocumab in Patients With High Cardiovascular Risk in Spain. *Clinical therapeutics*. 2017.
16. Fei Y, Guyatt GH, Alexander PE, El Dib R, Siemieniuk RA, Vandvik PO, et al. Addition of Ezetimibe to statins for patients at high cardiovascular risk: Systematic review of patient-important outcomes. *Journal of evaluation in clinical practice*. 2017.
17. Wang D, Liu B, Tao W, Hao Z, Liu M. Fibrates for secondary prevention of cardiovascular disease and stroke. *The Cochrane database of systematic reviews*. 2015(10):Cd009580.
18. Schwartz GG, Olsson AG, Abt M, Ballantyne CM, Barter PJ, Brumm J, et al. Effects of dalcetrapib in patients with a recent acute coronary syndrome. *The New England journal of medicine*. 2012;367(22):2089-99.
19. Lipinski MJ, Benedetto U, Escarcega RO, Biondi-Zoccai G, Lhermusier T, Baker NC, et al. The impact of proprotein convertase subtilisin-kexin type 9 serine protease inhibitors on lipid levels and outcomes in patients with primary hypercholesterolaemia: a network meta-analysis. *European heart journal*. 2016;37(6):536-45.
20. Ridker PM, Tardif J-C, Amarenco P, Duggan W, Glynn RJ, Jukema JW, et al. Lipid-Reduction Variability and Antidrug-Antibody Formation with Bococizumab. *New England Journal of Medicine*. 2017;376(16):1517-26.
21. Roth EM, Goldberg AC, Catapano AL, Torri A, Yancopoulos GD, Stahl N, et al. Antidrug Antibodies in Patients Treated with Alirocumab. *New England Journal of Medicine*. 2017;376(16):1589-90.

**Table 1: Estimated Events Per 1,000 Eligible Patients over Lifetime**

| Event                                      | Untreated | Treated | Events Prevented |
|--------------------------------------------|-----------|---------|------------------|
| Recurrent Myocardial Infarction            | 460.8     | 404.9   | 56.0             |
| CVD Death                                  | 416.7     | 361.5   | 55.2             |
| New MI or Recurrent MI                     | 484.2     | 429.9   | 54.3             |
| CVD Death, MI (New or Recurrent) or Stroke | 752.7     | 700.7   | 51.9             |
| Stroke or TIA                              | 354.2     | 324.9   | 29.3             |
| Fatal MI                                   | 149.2     | 120.1   | 29.2             |
| Stroke                                     | 293.8     | 266.3   | 27.5             |
| Sudden Death                               | 87.5      | 70.1    | 17.3             |
| Stroke Death                               | 96.4      | 83.8    | 12.5             |
| Transient Ischemic Attack                  | 92.8      | 85.5    | 7.3              |
| Newly Diagnosed Diabetes                   | 332.5     | 327.3   | 5.2              |
| New Myocardial Infarction                  | 52.1      | 49.2    | 2.9              |
| Angina Pectoris                            | 41.5      | 38.7    | 2.8              |
| Coronary Insufficiency                     | 9.7       | 9.1     | 0.6              |
| CHF Death                                  | 84.9      | 88.5    | -3.6             |
| Congestive Heart Failure                   | 107.5     | 111.2   | -3.7             |
| Other Death                                | 579.2     | 634.6   | -55.4            |

CVD: Cardiovascular disease; MI: Myocardial Infarction; TIA: Transient Ischemic Attack

Table 2: Average Estimated Years of Life Saved and Associated Costs by Gender and Age - Discounted

| Sex                                                                                                                                                                                                         | Age | Years of Therapy |             | YOLS        | 95% CI           | Difference in Lifetime Cost | 95% CI Lifetime Cost  | Cost Per YOLS  |
|-------------------------------------------------------------------------------------------------------------------------------------------------------------------------------------------------------------|-----|------------------|-------------|-------------|------------------|-----------------------------|-----------------------|----------------|
|                                                                                                                                                                                                             |     | Control          | Treated     |             |                  |                             |                       |                |
| <b>Male</b>                                                                                                                                                                                                 |     |                  |             |             |                  |                             |                       |                |
|                                                                                                                                                                                                             | 45  | 18.6             | 19.1        | 0.45        | 0.37-0.53        | 144 110                     | 115 628-172 593       | 318 335        |
|                                                                                                                                                                                                             | 55  | 15.6             | 16.0        | 0.42        | 0.34-0.51        | 120 574                     | 97 031-144 117        | 284 306        |
|                                                                                                                                                                                                             | 65  | 12.1             | 12.5        | 0.36        | 0.29-0.44        | 93 083                      | 76 276-109 890        | 257 348        |
|                                                                                                                                                                                                             | 75  | 8.6              | 8.8         | 0.27        | 0.23-0.31        | 65 357                      | 54 354-76 359         | 243 414        |
| <b>Female</b>                                                                                                                                                                                               |     |                  |             |             |                  |                             |                       |                |
|                                                                                                                                                                                                             | 45  | 20.0             | 20.3        | 0.29        | 0.20-0.37        | 151 539                     | 120 778-182 299       | 528 009        |
|                                                                                                                                                                                                             | 55  | 16.9             | 17.2        | 0.29        | 0.20-0.37        | 128 236                     | 102 937-153 535       | 448 221        |
|                                                                                                                                                                                                             | 65  | 13.3             | 13.6        | 0.26        | 0.20-0.33        | 99 871                      | 82 313-117 430        | 382 796        |
|                                                                                                                                                                                                             | 75  | 9.7              | 9.9         | 0.17        | 0.12-0.21        | 71 607                      | 60 198-83 016         | 422 710        |
| <b>Overall</b>                                                                                                                                                                                              |     | <b>13.3</b>      | <b>13.6</b> | <b>0.34</b> | <b>0.27-0.41</b> | <b>101 899</b>              | <b>97 325-106 473</b> | <b>299 482</b> |
| CI: Confidence Interval; YOLS: Years of Life Saved.<br>Difference in costs in current Canadian dollars (see Methods).<br>Overall is weighted for the age and gender distributions seen in the Fourier trial |     |                  |             |             |                  |                             |                       |                |

1  
2  
3  
4  
5  
6  
7  
8  
9  
10  
11  
12  
13  
14  
15  
16  
17  
18  
19  
20  
21  
22  
23  
24  
25  
26  
27  
28  
29  
30  
31  
32  
33  
34  
35  
36  
37  
38  
39  
40  
41  
42  
43  
44  
45  
46  
47  
48  
49  
50  
51  
52  
53  
54  
55  
56  
57  
58  
59  
60

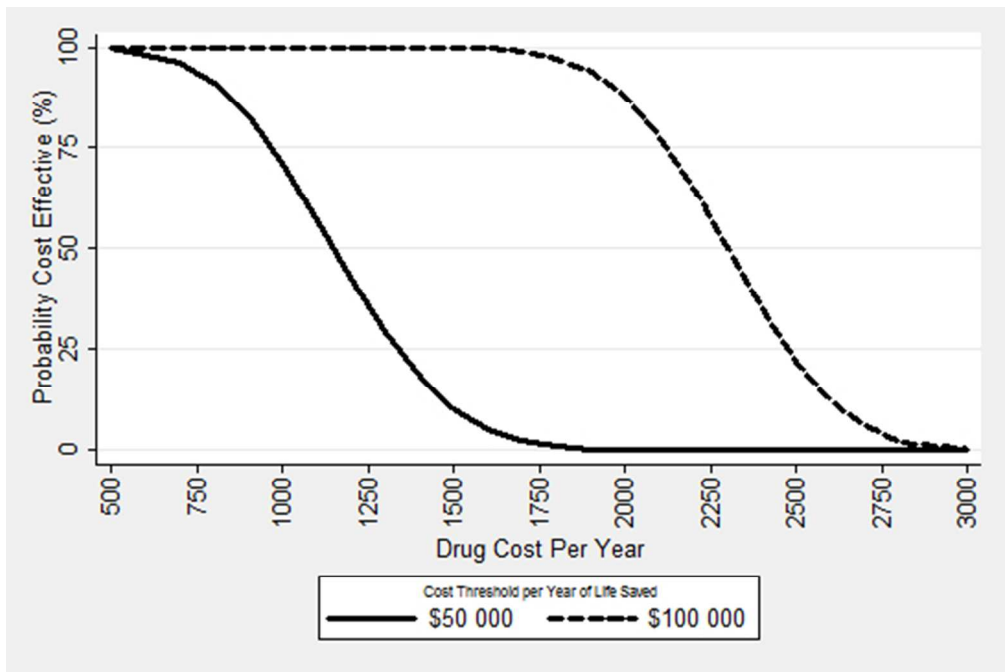

Figure 1: Probability Estimates of Willingness to Pay per Year of Life Saved

**Table S1: Estimated Cost of Events Adjusted to 2016 Canadian Dollars**

| <b>Outcome</b>                           | <b>Estimated Cost</b> |
|------------------------------------------|-----------------------|
| Sudden Coronary Death                    | 664                   |
| Fatal Myocardial Infarction              | 7 331                 |
| Stroke Death                             | 7 169                 |
| Angina Pectoris (Uncomplicated)          | 2 648                 |
| Coronary Insufficiency                   | 3 877                 |
| Non-Fatal Myocardial Infarction          | 6 952                 |
| Re-Infarction                            | 6 952                 |
| Congestive Heart Failure                 | 5 056                 |
| Transient Ischaemic Attack               | 3 133                 |
| Stroke                                   | 6 745                 |
| Angioplasty                              | 8 975                 |
| Coronary Artery Bypass Graft Surgery     | 18 532                |
| Cardiac Catheterisation                  | 4 461                 |
| Pacemaker Insertion                      | 15 649                |
| Arrhythmia                               | 3 263                 |
| Drug                                     | 7500                  |
| <b>Post-Hospitalization Costs</b>        |                       |
| <b>Coronary Heart Disease alone</b>      |                       |
| First Year                               | 2 938                 |
| Subsequent Year                          | 2 719                 |
| <b>TIA alone</b>                         |                       |
| First Year                               | 1 436                 |
| Subsequent Years                         | 1 396                 |
| <b>Stroke Alone</b>                      |                       |
| First Year                               | 6 728                 |
| Subsequent Years                         | 10 287                |
| <b>Coronary Heart Disease and TIA</b>    |                       |
| First Year TIA                           | 2 457                 |
| First Year Coronary Heart Disease        | 2 625                 |
| Subsequent Years                         | 2 425                 |
| <b>Coronary Heart Disease and Stroke</b> |                       |
| First Year Stroke                        | 8 102                 |
| First Year Coronary Heart Disease        | 10 646                |
| Subsequent Years                         | 10 446                |
| TIA: Transient Ischemic Attack           |                       |

1  
2  
3  
4  
5  
6  
7  
8  
9  
10  
11  
12  
13  
14  
15  
16  
17  
18  
19  
20  
21  
22  
23  
24  
25  
26  
27  
28  
29  
30  
31  
32  
33  
34  
35  
36  
37  
38  
39  
40  
41  
42  
43  
44  
45  
46  
47  
48  
49

**CHEERS Checklist**

**Items to include when reporting economic evaluations of health interventions**

The **ISPOR CHEERS Task Force Report, Consolidated Health Economic Evaluation Reporting Standards (CHEERS)—Explanation and Elaboration: A Report of the ISPOR Health Economic Evaluations Publication Guidelines Good Reporting Practices Task Force**, provides examples and further discussion of the 24-item CHEERS Checklist and the CHEERS Statement. It may be accessed via the *Value in Health* or via the ISPOR Health Economic Evaluation Publication Guidelines – CHEERS: Good Reporting Practices webpage: <http://www.ispor.org/TaskForces/EconomicPubGuidelines.asp>

| Section/item                    | Item No | Recommendation                                                                                                                                                                              | Reported on page No/line No     |
|---------------------------------|---------|---------------------------------------------------------------------------------------------------------------------------------------------------------------------------------------------|---------------------------------|
| <b>Title and abstract</b>       |         |                                                                                                                                                                                             |                                 |
| Title                           | 1       | Identify the study as an economic evaluation or use more specific terms such as “cost-effectiveness analysis”, and describe the interventions compared.                                     | YES                             |
| Abstract                        | 2       | Provide a structured summary of objectives, perspective, setting, methods (including study design and inputs), results (including base case and uncertainty analyses), and conclusions.     | YES                             |
| <b>Introduction</b>             |         |                                                                                                                                                                                             |                                 |
| Background and objectives       | 3       | Provide an explicit statement of the broader context for the study.<br>Present the study question and its relevance for health policy or practice decisions.                                | YES                             |
| <b>Methods</b>                  |         |                                                                                                                                                                                             |                                 |
| Target population and subgroups | 4       | Describe characteristics of the base case population and subgroups analysed, including why they were chosen.                                                                                | YES                             |
| Setting and location            | 5       | State relevant aspects of the system(s) in which the decision(s) need(s) to be made.                                                                                                        | YES - implied                   |
| Study perspective               | 6       | Describe the perspective of the study and relate this to the costs being evaluated.                                                                                                         | YES                             |
| Comparators                     | 7       | Describe the interventions or strategies being compared and state why they were chosen.                                                                                                     | YES                             |
| Time horizon                    | 8       | State the time horizon(s) over which costs and consequences are being evaluated and say why appropriate.                                                                                    | YES                             |
| Discount rate                   | 9       | Report the choice of discount rate(s) used for costs and outcomes and say why appropriate.                                                                                                  | YES                             |
| Choice of health outcomes       | 10      | Describe what outcomes were used as the measure(s) of benefit in the evaluation and their relevance for the type of analysis performed.                                                     | YES                             |
| Measurement of effectiveness    | 11a     | <i>Single study-based estimates</i> : Describe fully the design features of the single effectiveness study and why the single study was a sufficient source of clinical effectiveness data. | There is only one paper<br>None |

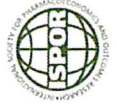



|                                                        |                                                                                                                                                                                                                                                                                                                                                       |                      |
|--------------------------------------------------------|-------------------------------------------------------------------------------------------------------------------------------------------------------------------------------------------------------------------------------------------------------------------------------------------------------------------------------------------------------|----------------------|
| 11b                                                    | <i>Synthesis-based estimates</i> : Describe fully the methods used for identification of included studies and synthesis of clinical effectiveness data.                                                                                                                                                                                               | N/A.                 |
| Measurement and valuation of preference based outcomes | If applicable, describe the population and methods used to elicit preferences for outcomes.                                                                                                                                                                                                                                                           | N/A.                 |
| 13a                                                    | <i>Single study-based economic evaluation</i> : Describe approaches used to estimate resource use associated with the alternative interventions. Describe primary or secondary research methods for valuing each resource item in terms of its unit cost. Describe any adjustments made to approximate to opportunity costs.                          | Cited & explained.   |
| 13b                                                    | <i>Model-based economic evaluation</i> : Describe approaches and data sources used to estimate resource use associated with model health states. Describe primary or secondary research methods for valuing each resource item in terms of its unit cost. Describe any adjustments made to approximate to opportunity costs.                          | N/A.                 |
| 14                                                     | Report the dates of the estimated resource quantities and unit costs. Describe methods for adjusting estimated unit costs to the year of reported costs if necessary. Describe methods for converting costs into a common currency base and the exchange rate.                                                                                        | YES, it's supported. |
| 15                                                     | Describe and give reasons for the specific type of decision-analytical model used. Providing a figure to show model structure is strongly recommended.                                                                                                                                                                                                | Source publications. |
| 16                                                     | Describe all structural or other assumptions underpinning the decision-analytical model.                                                                                                                                                                                                                                                              | Source publications. |
| 17                                                     | Describe all analytical methods supporting the evaluation. This could include methods for dealing with skewed, missing, or censored data; extrapolation methods; methods for pooling data; approaches to validate or make adjustments (such as half cycle corrections) to a model; and methods for handling population heterogeneity and uncertainty. | N/A                  |
| <b>Results</b>                                         |                                                                                                                                                                                                                                                                                                                                                       |                      |
| 18                                                     | Report the values, ranges, references, and, if used, probability distributions for all parameters. Report reasons or sources for distributions used to represent uncertainty where appropriate. Providing a table to show the input values is strongly recommended.                                                                                   | YES                  |
| 19                                                     | For each intervention, report mean values for the main categories of estimated costs and outcomes of interest, as well as mean differences between the comparator groups. If applicable, report incremental cost-effectiveness ratios.                                                                                                                | YES                  |
| 20a                                                    | <i>Single study-based economic evaluation</i> : Describe the effects of sampling uncertainty for the estimated incremental cost and incremental effectiveness parameters, together with the impact                                                                                                                                                    | Five 1               |

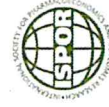

1  
2  
3  
4  
5  
6  
7  
8  
9  
10  
11  
12  
13  
14  
15  
16  
17  
18  
19  
20  
21  
22  
23  
24  
25  
26  
27  
28  
29  
30  
31  
32  
33  
34  
35  
36  
37  
38  
39  
40  
41  
42  
43  
44  
45  
46  
47  
48  
49

|                   |                                                                                                                                                                                                                                                                            |                 |
|-------------------|----------------------------------------------------------------------------------------------------------------------------------------------------------------------------------------------------------------------------------------------------------------------------|-----------------|
|                   | of methodological assumptions (such as discount rate, study perspective).                                                                                                                                                                                                  |                 |
| 20b               | <i>Model-based economic evaluation</i> : Describe the effects on the results of uncertainty for all input parameters, and uncertainty related to the structure of the model and assumptions.                                                                               | N/A.            |
| 21                | If applicable, report differences in costs, outcomes, or cost-effectiveness that can be explained by variations between subgroups of patients with different baseline characteristics or other observed variability in effects that are not reducible by more information. | Table 2.        |
| <b>Discussion</b> |                                                                                                                                                                                                                                                                            |                 |
| 22                | Summarise key study findings and describe how they support the conclusions reached. Discuss limitations and the generalisability of the findings and how the findings fit with current knowledge.                                                                          | Y/S             |
| <b>Other</b>      |                                                                                                                                                                                                                                                                            |                 |
| 23                | Describe how the study was funded and the role of the funder in the identification, design, conduct, and reporting of the analysis. Describe other non-monetary sources of support.                                                                                        | Y/S             |
| 24                | Describe any potential for conflict of interest of study contributors in accordance with journal policy. In the absence of a journal policy, we recommend authors comply with International Committee of Medical Journal Editors recommendations.                          | Openly journal. |

For consistency, the CHEERS Statement checklist format is based on the format of the CONSORT statement checklist

The **ISPOR CHEERS Task Force Report** provides examples and further discussion of the 24-item CHEERS Checklist and the CHEERS Statement. It may be accessed via the *Value in Health* link or via the ISPOR Health Economic Evaluation Publication Guidelines – CHEERS: Good Reporting Practices webpage: <http://www.ispor.org/TaskForces/EconomicPubGuidelines.asp>

The citation for the CHEERS Task Force Report is:  
Husereau D, Drummond M, Petrou S, et al. Consolidated health economic evaluation reporting standards (CHEERS)—Explanation and elaboration: A report of the ISPOR health economic evaluations publication guidelines good reporting practices task force. *Value Health* 2013;16:231-50.

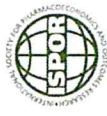

Supplement: original-submission.pdf [file original-submission.pdf]
