# Supplementary material
Source: PubMed Central journal article supplement (PMC7869663)
Supplement: 2018-0011-1-at.pdf [file 2018-0011-1-at.pdf]

**Appendix 1 (as supplied by the authors):** Estimated cost of events adjusted to 2016 Canadian dollars

| <b>Supplementary Table S1: Estimated Cost of Events Adjusted to 2016 Canadian Dollars</b> |                       |
|-------------------------------------------------------------------------------------------|-----------------------|
| <b>Outcome</b>                                                                            | <b>Estimated Cost</b> |
| Sudden Coronary Death                                                                     | 664                   |
| Fatal Myocardial Infarction                                                               | 7 331                 |
| Stroke Death                                                                              | 7 169                 |
| Angina Pectoris (Uncomplicated)                                                           | 2 648                 |
| Coronary Insufficiency                                                                    | 3 877                 |
| Non-Fatal Myocardial Infarction                                                           | 6 952                 |
| Re-Infarction                                                                             | 6 952                 |
| Congestive Heart Failure                                                                  | 5 056                 |
| Transient Ischaemic Attack                                                                | 3 133                 |
| Stroke                                                                                    | 6 745                 |
| Angioplasty                                                                               | 8 975                 |
| Coronary Artery Bypass Graft Surgery                                                      | 18 532                |
| Cardiac Catheterisation                                                                   | 4 461                 |
| Pacemaker Insertion                                                                       | 15 649                |
| Arrhythmia                                                                                | 3 263                 |
| Drug                                                                                      | 7500                  |
| <b>Post-Hospitalization Costs</b>                                                         |                       |
| <b>Coronary Heart Disease alone</b>                                                       |                       |
| First Year                                                                                | 2 938                 |
| Subsequent Year                                                                           | 2 719                 |
| <b>TIA alone</b>                                                                          |                       |
| First Year                                                                                | 1 436                 |
| Subsequent Years                                                                          | 1 396                 |
| <b>Stroke Alone</b>                                                                       |                       |
| First Year                                                                                | 6 728                 |
| Subsequent Years                                                                          | 10 287                |
| <b>Coronary Heart Disease and TIA</b>                                                     |                       |
| First Year TIA                                                                            | 2 457                 |
| First Year Coronary Heart Disease                                                         | 2 625                 |
| Subsequent Years                                                                          | 2 425                 |
| <b>Coronary Heart Disease and Stroke</b>                                                  |                       |
| First Year Stroke                                                                         | 8 102                 |
| First Year Coronary Heart Disease                                                         | 10 646                |
| Subsequent Years                                                                          | 10 446                |
| TIA: Transient Ischemic Attack                                                            |                       |
